# Supplementary material
Source: PubMed Central journal article supplement (PMC2553298)
Supplement: JCI0835432sd.pdf [file JCI0835432sd.pdf]

## **Supplementary text**

### **Analysis of cell migration**

Dye fluorescent (PKH26) labeled cells were delivered into the cerebral spinal fluid (CSF) to evaluate ALDH<sup>hi</sup>SSC<sup>lo</sup> cell migration within the parenchyma (Supplementary Fig. 3).

Donor cells survived and proliferated, generating cell clusters laterally in the spinal cord parenchyma attached to the meninges. A total of 20% of these cells had already migrated into the spinal cord parenchyma through the pia mater as early as 5–7 days after transplantation. Cell invasion was also observed at root exits. Cell clusters were situated preferentially near the blood vessels and were probably favored by the nutrient supply. Few cells were detected in the brain of recipient animals, particularly in the area directly adjacent to the ventricular system. Cell attachments on the spinal cord surface as well as the cell cluster formations were less frequent in wild-type mice. Only 2–3% of donor cells invaded the parenchyma of non-mutated mice within 7 days.

### **Analysis of SMN expression in transplanted SMA spinal cord**

We demonstrated that SMN+7 (full-length) mRNA levels had increased in the laser capture motoneurons after transplantation (2.1 fold,  $P = 0.01$ , treated SMA vs untreated SMA) (Supplementary Fig. 8). Western blot analysis of protein isolated from whole spinal cord tissue of SMA mice revealed the presence of both the full-length SMN protein and the SMN $\Delta$ 7 protein, as previously described in these mice (4). The level of full-length SMN protein in SMA mice was at least 14-fold lower than in wt. No apparent change in the ratio of full-length to SMN $\Delta$ 7 protein was evident after transplantation in the whole spinal cord of SMA mice (Supplementary Fig. 8).

### **Analysis of Cdkn1a and Hsbp1 protein levels in primary spinal motoneurons (PMNs) from SMA mice**

We evaluated the expression of Cdkn1a and Hsbp1 proteins in SMA PNMs before and after coculture with ALDH<sup>hi</sup>SSC<sup>lo</sup> cells (Fig 9s c, d). We demonstrated that isolated PMNs from SMA expressed higher levels of Cdkn1a compared to wt (1.6 fold,  $P = 0.007$ , SMA vs wt). No difference was observed in Hsbp1 protein levels. The protein level was not modified by the coculture system.

## Supplementary Figures

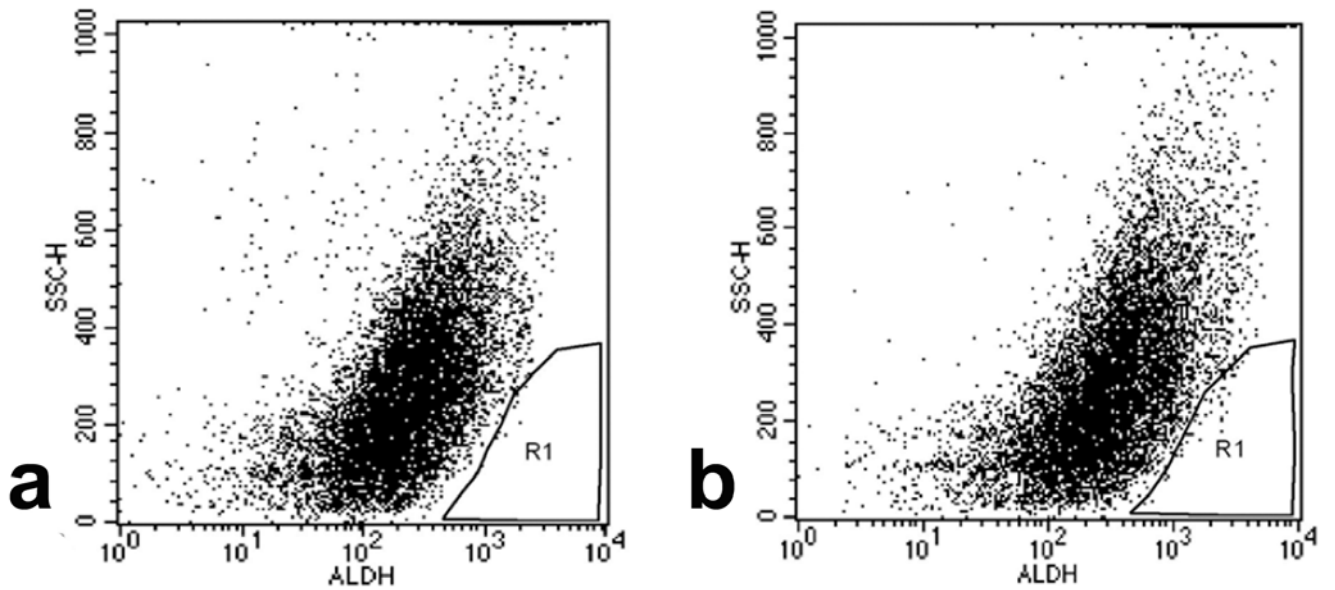

**Figure 1 s**

**Identification, isolation, and differentiation of ALDH<sup>hi</sup> SSC<sup>lo</sup> cells into motoneuron-like cells.**

(a, b) Flow cytometric analysis of ALDH activity on spinal-cord-derived NSCs. ALDH<sup>hi</sup> SSC<sup>lo</sup> cells were selected based on forward scatter (FSC) and side scatter (SSC) characteristics. NSCs incubated with Aldefluor substrate and the specific inhibitor of ALDH, diethylaminobenzaldehyde (DEAB), were used to establish the baseline fluorescence of these cells and to define the ALDH<sup>hi</sup> region (a). Incubation of NSCs with Aldefluor substrate in the absence of an inhibitor induced a shift in FL1 fluorescence, defining the ALDH<sup>hi</sup> population (b).

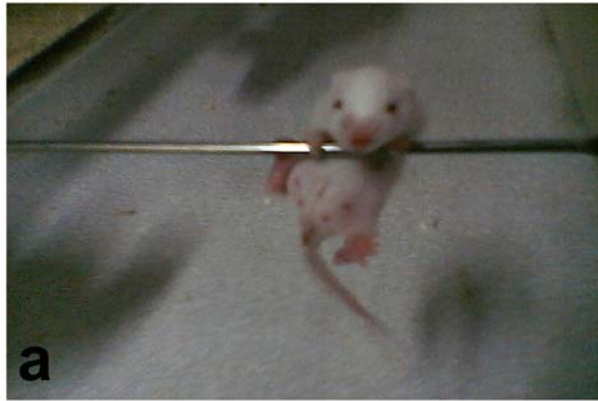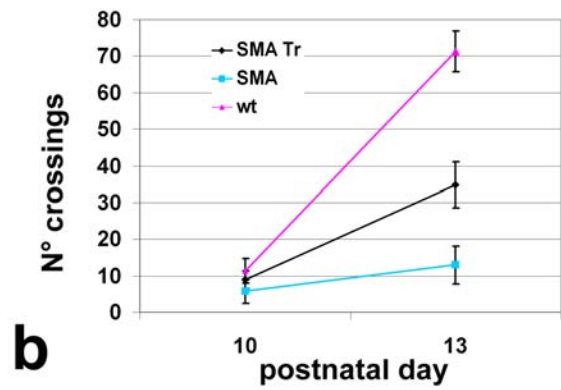

**Figure 2 s**

**Neuromuscular evaluation of SMA mice.**

(a) Photograph of hand grip assay of a treated SMA mouse. (b) Number of crossings in the open-field test in treated SMA mice (SMA Tr) and in untreated (SMA) and wild-type mice (wt). At 13 days of age, the number of crossings made by treated mice was significantly different from that of untreated mice ( $P < 0.00001$ ).

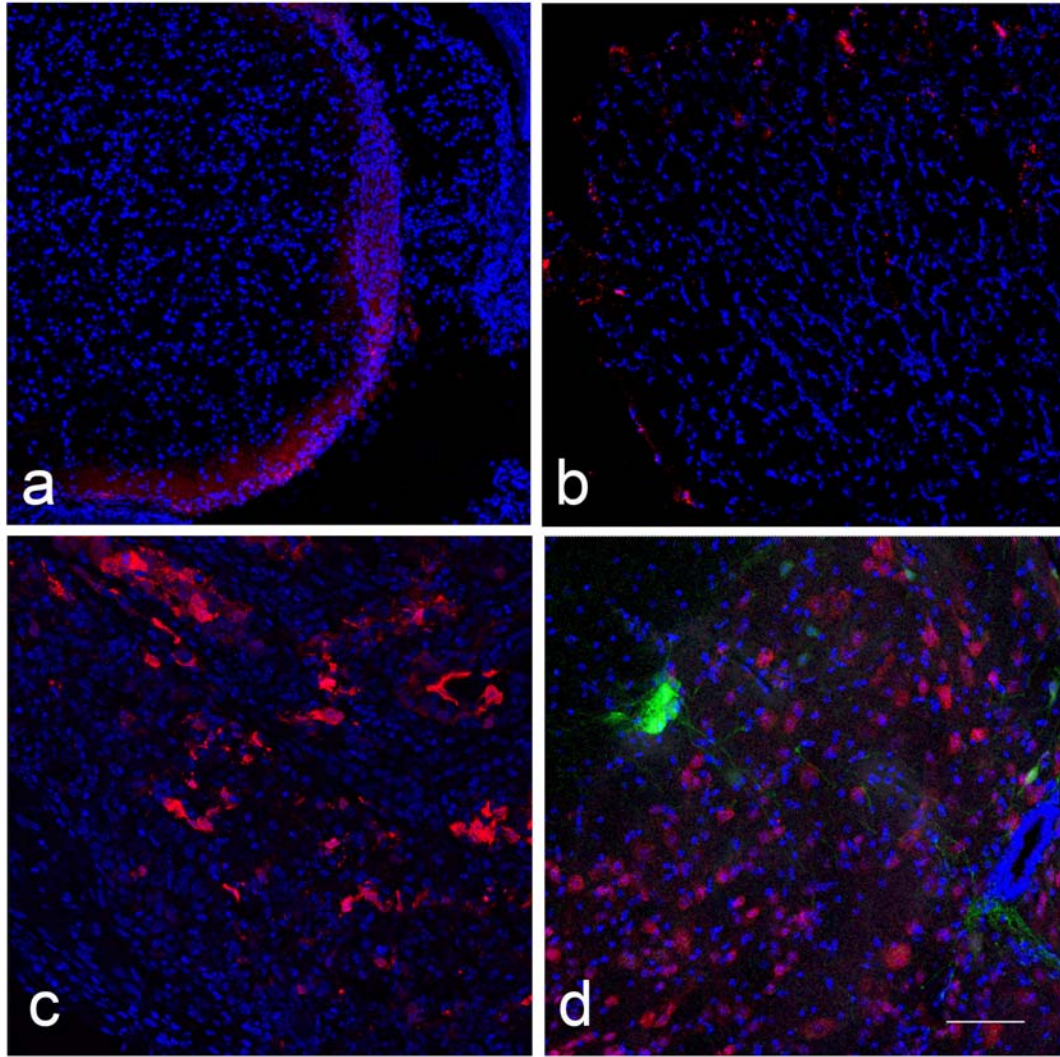

**Figure 3 s**

**ALDH<sup>hi</sup>SSC<sup>lo</sup> cell migration into the spinal cord after intrathecal delivery.**

Dye fluorescent (PKH26, red signal)-labeled cells were delivered into the CSF to evaluate ALDH<sup>hi</sup>SSC<sup>lo</sup> cell migration into the parenchyma. Five days after transplantation (**a**), donor cells were located laterally in the spinal cord parenchyma attached to the meninges, initiating through the pia mater in the parenchyma. After 7 (**b**) and 10 days (**c**), donor cells were observed in the parenchyma in gray and white matter. At the end of the disease, HB9-GFP neurons were detected in the ventral horn of transplanted mice (**d**). In panel (**d**), neurons are stained for the neuronal antigen NeuN (red signal). Scale bar: **a**: 300  $\mu$ m; **b-d**: 100  $\mu$ m.

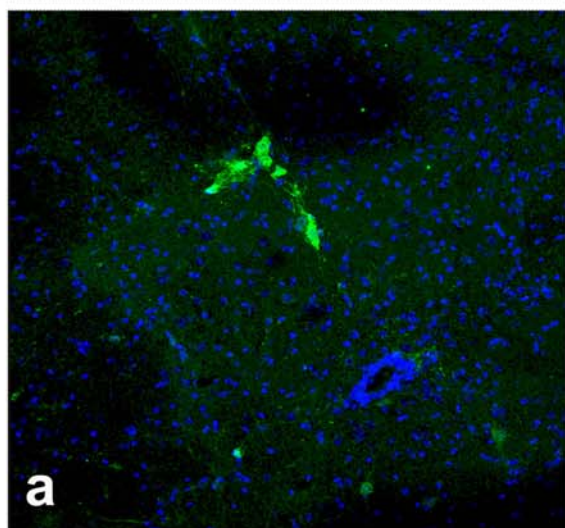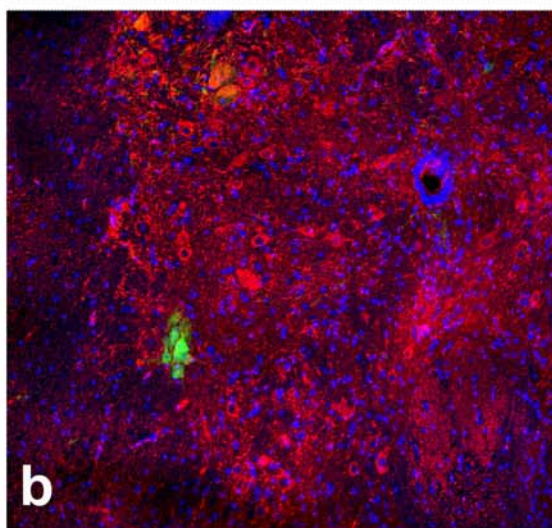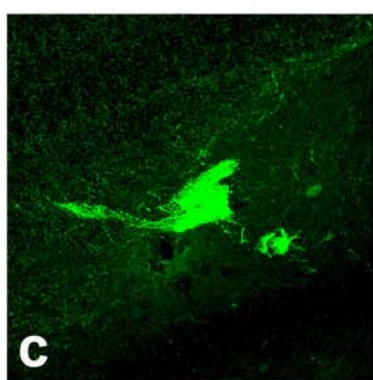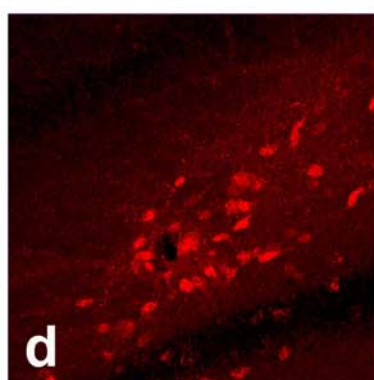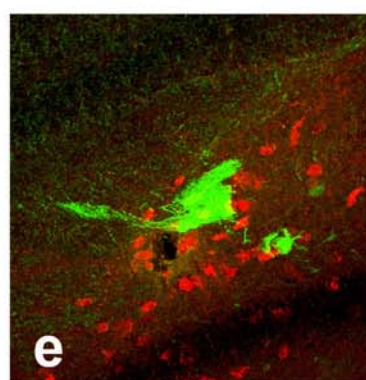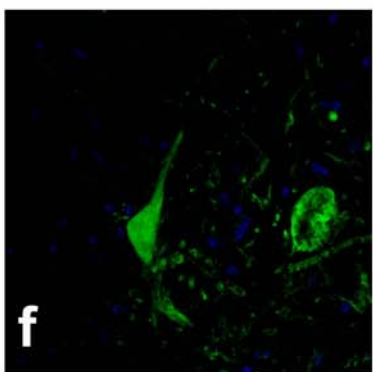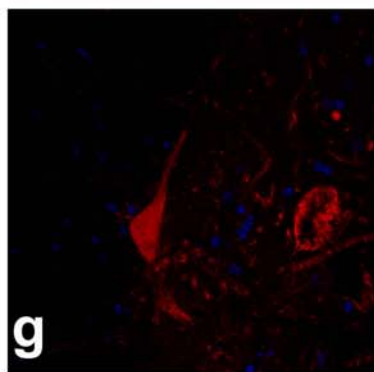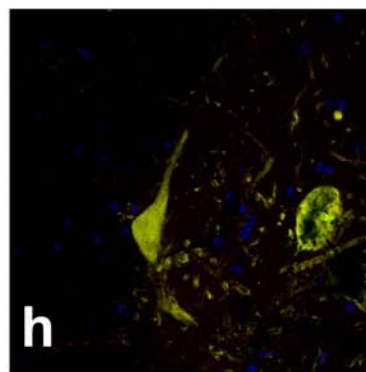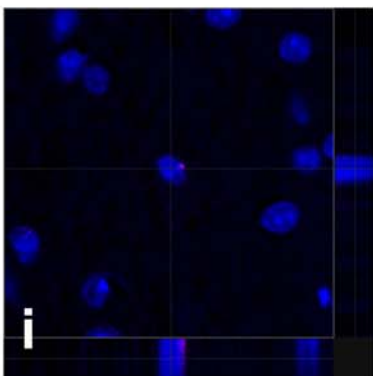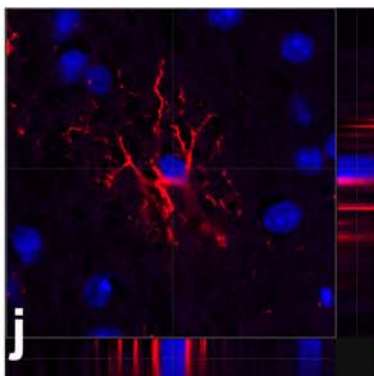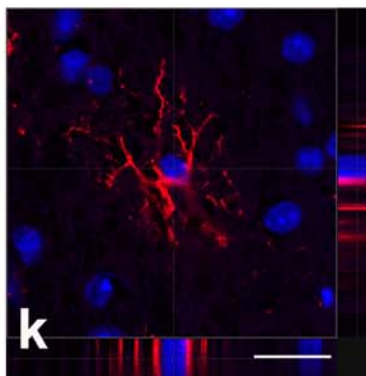

## Figure 4 s

### **ALDH<sup>hi</sup>SSC<sup>lo</sup> cells transplanted into SMA mice engraft the host spinal cord.**

ALDH<sup>hi</sup>SSC<sup>lo</sup> cells derived from HB9-GFP mice were transplanted intrathecally in P1 SMA mice. GFP<sup>+</sup> neurons were detected in the anterior horn of the spinal cord, as shown in spinal cord coronal sections (**a**, **b**). Immunohistochemistry for neuroectodermal markers confirmed that these cells are differentiated into neurons. Confocal microscopy showed that GFP donor-derived neurons co-express neuronal specific proteins such as NF (**b**) and NeuN (**c–e**). (**f–h**) GFP cells present motoneuronal characteristics, as demonstrated by double immunofluorescence staining of GFP (green) under the HB9-specific motoneuronal promoter and cholinergic neurotransmitter (**f**: GFP; **g**: ChAT; **h**: merge). FISH analysis for Y chromosome in sex-mismatched transplantation experiments (male donor cells into a female recipient) permit the detection of other non-neuronal fates undertaken by transplanted cells such as astrocytes, as shown in **i–k**. **i**: Y chromosome (pink dot); **f**: GFAP (red signal); **k**: merge. Scale bars: **a–b**: 300  $\mu$ m; **i–k**: 75  $\mu$ m.

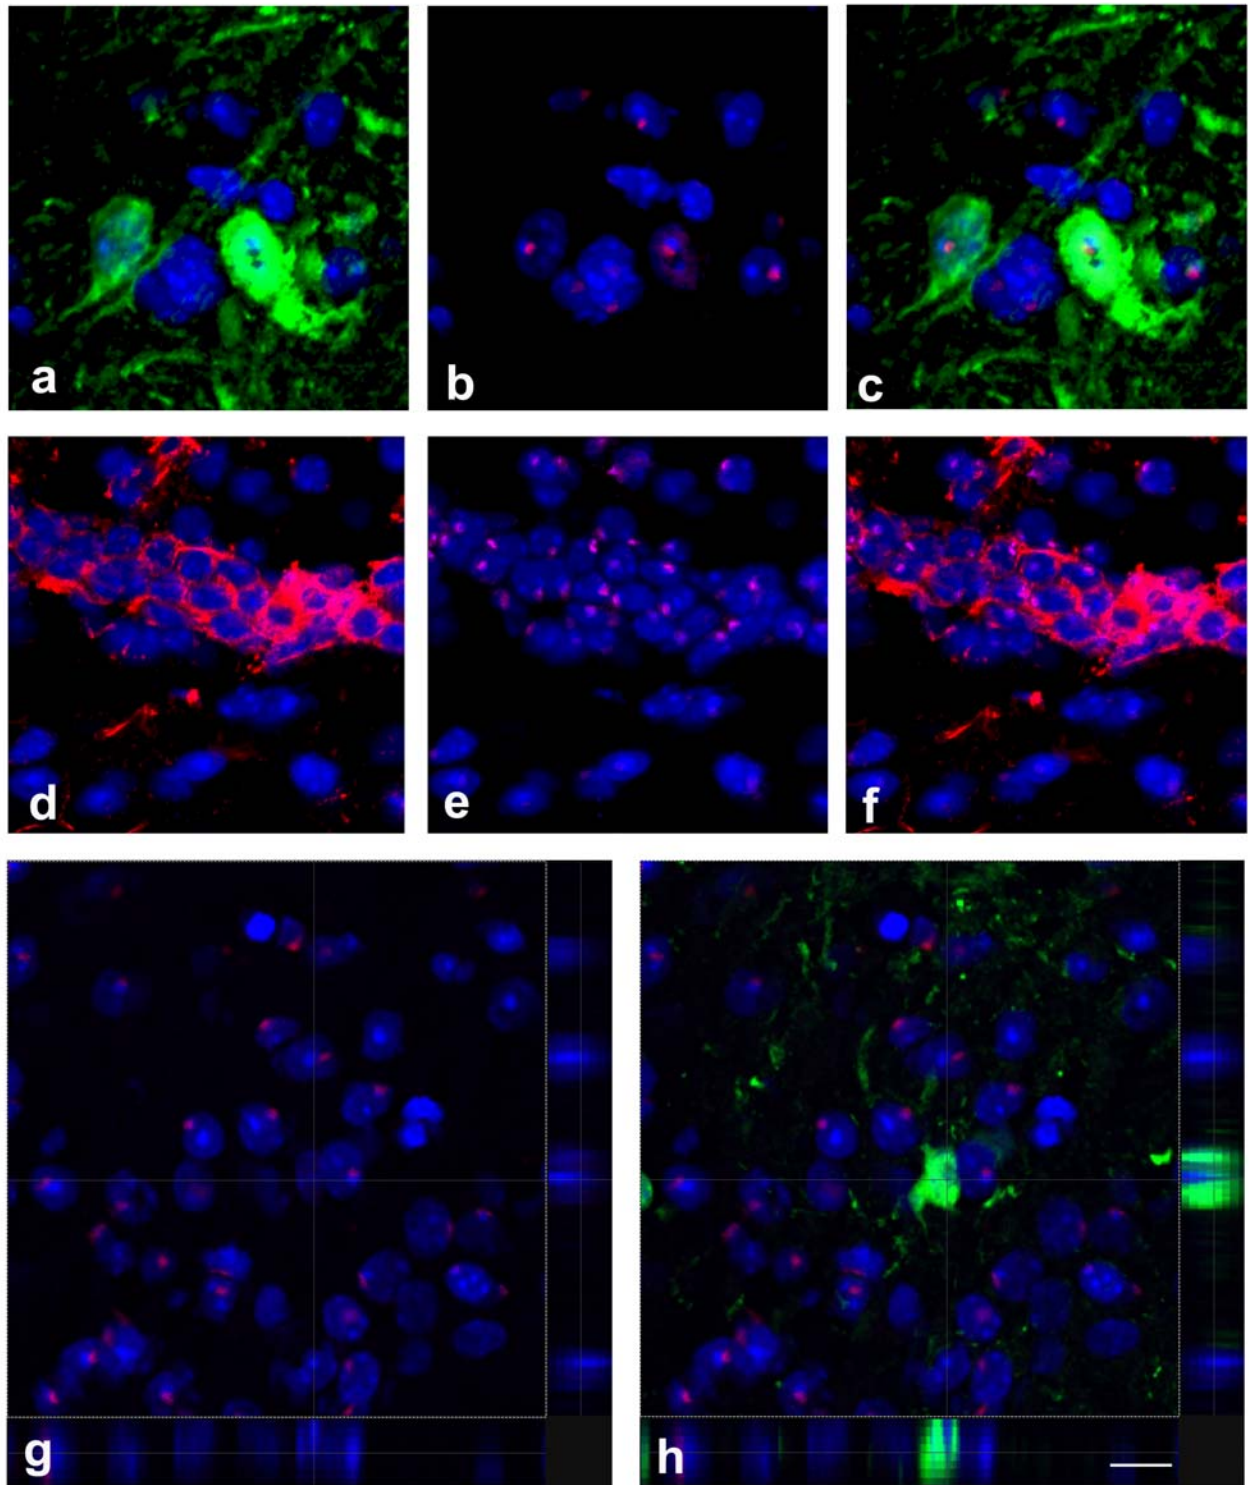

**Figure 5 s**

### **FISH analysis of SMA-transplanted spinal cord**

**a–f:** FISH analysis for Y chromosome (dot signal) in sex-mismatched transplantation experiments (male donor cells into a female recipient) allows confirmation of the donor origin of HB9-GFP cells

(**a–c**), as well as detection of other phenotypes, such as donor neural stem/precursor cells, positive for nestin and Y chromosome, as shown in **d–f**.

(**a–c**) Two HB9-GFP neurons (green, **a**) presenting Y-positive signal (red dots, **b**) surrounded by other male donor cells (Y-positive red dots, **b**) and female host cells (negative for red signals, **b**). (**c**): merge. **d–f**: Donor neural stem/precursor cells, positive for nestin (red, **d**) and Y chromosome (purple, **e**). (**f**): merge.

**g–h**: FISH analysis for Y chromosome in male SMA mouse spinal cord recipients transplanted with donor female Hb9 cells permits exclusion of cell fusion events as shown in panels **g–i** in which a three-dimensional confocal reconstruction demonstrates an HB9-derived neuron that does not express the Y chromosome signal, surrounded by Y-positive male host cells (**g**: blue DAPI-stained nuclei with FISH red dot signals; **h**: merge with GFP). Scale bar: **a–c**: 35  $\mu\text{m}$ ; **d–f**: 50  $\mu\text{m}$ ; **g–h**: 50  $\mu\text{m}$ .

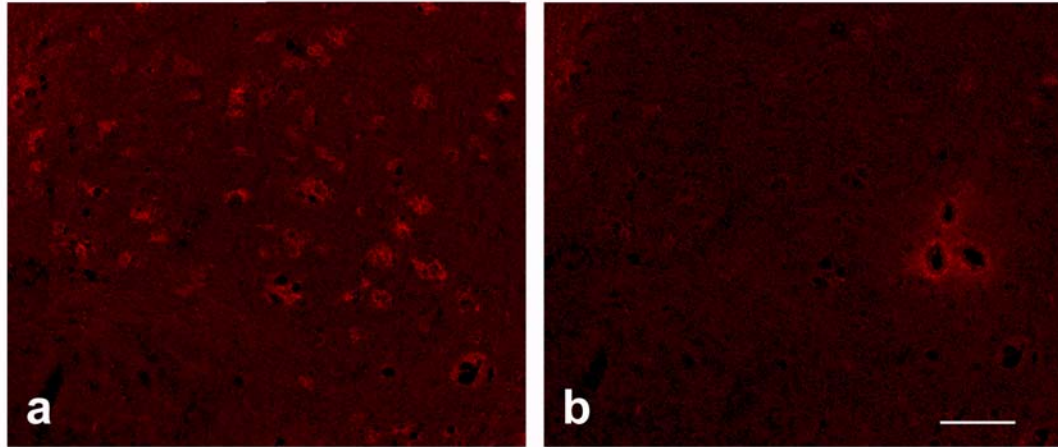

**Figure 6 s**

**Laser capture microdissection (LCM) of endogenous SMA motoneurons**

(**a, b**) Motoneuron cells stained for ChAT before (**a**) and after microdissection (**b**). Scale bar: 70  $\mu\text{m}$ .

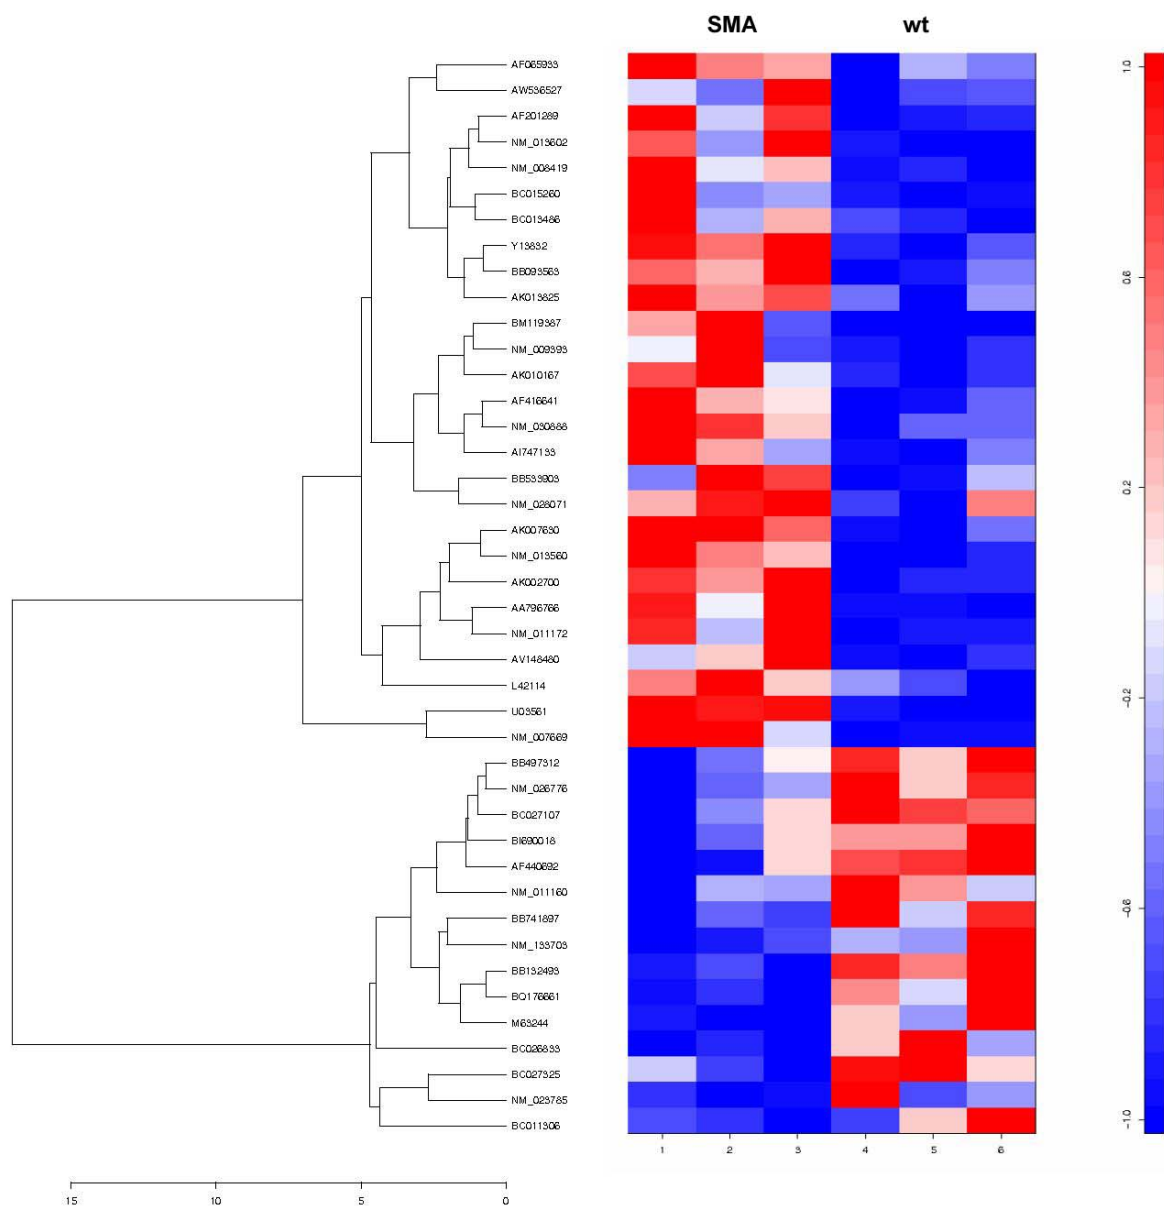

**Figure 7 s**

**Cluster analysis of the differentially expressed genes in the comparison between SMA untreated and wt motoneurons.**

The hierarchical cluster clearly subdivides upregulated (red) and downregulated (blue) genes in both groups. Color scale helps to visualize internal similarity.

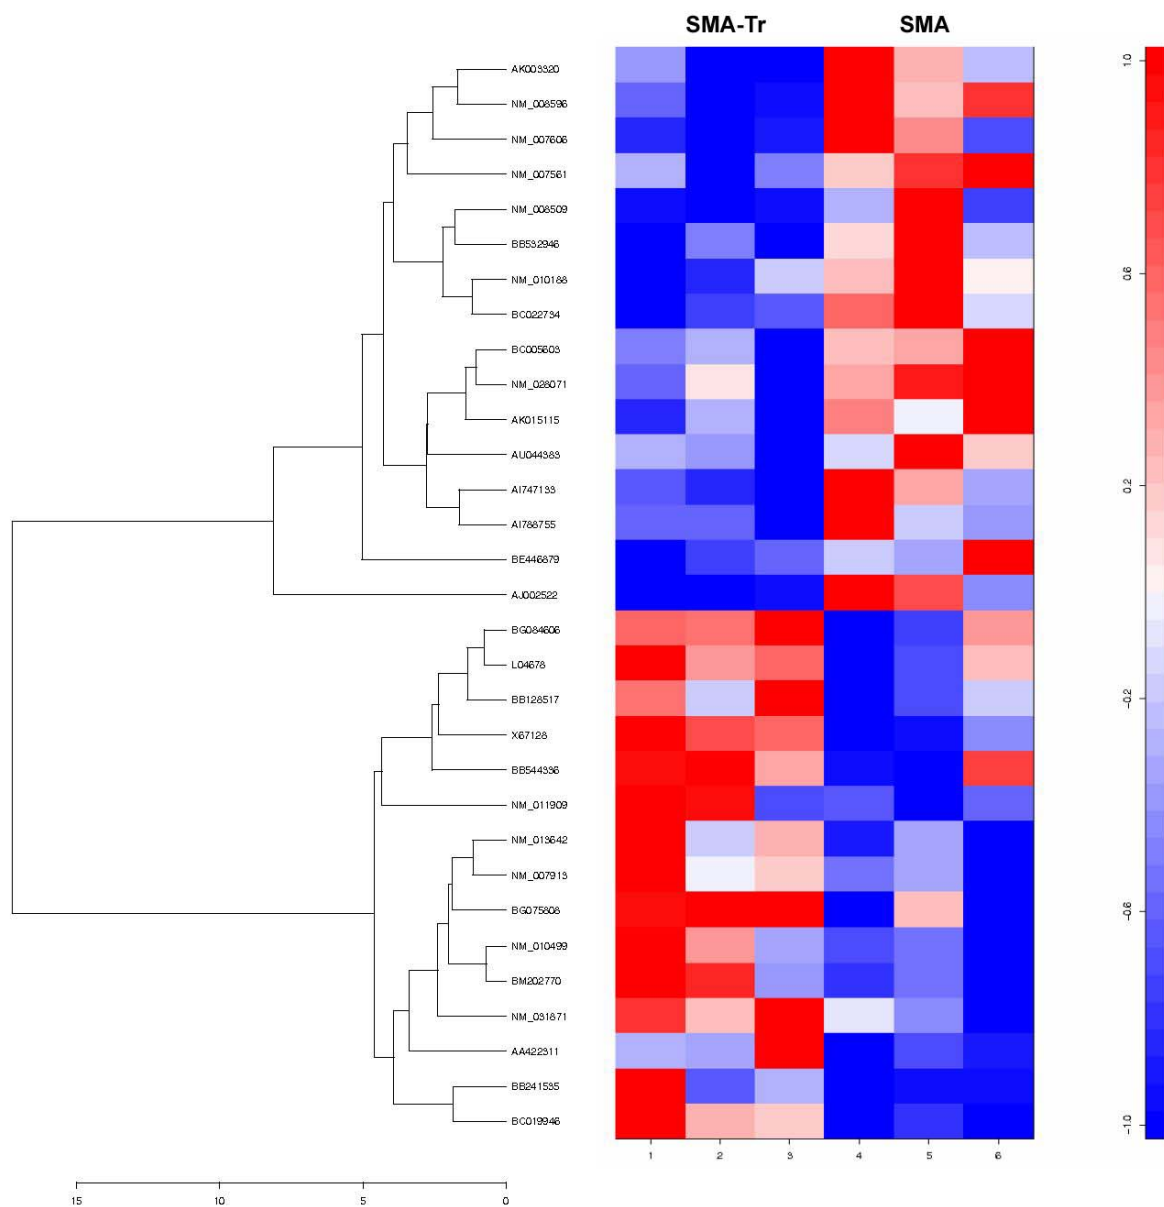

**Figure 8 s**

**Cluster analysis of differentially expressed genes in the comparison between SMA treated and untreated motoneurons.**

The hierarchical cluster subdivides upregulated (red) and downregulated (blue) genes in both groups. Color scale helps to visualize internal similarity.

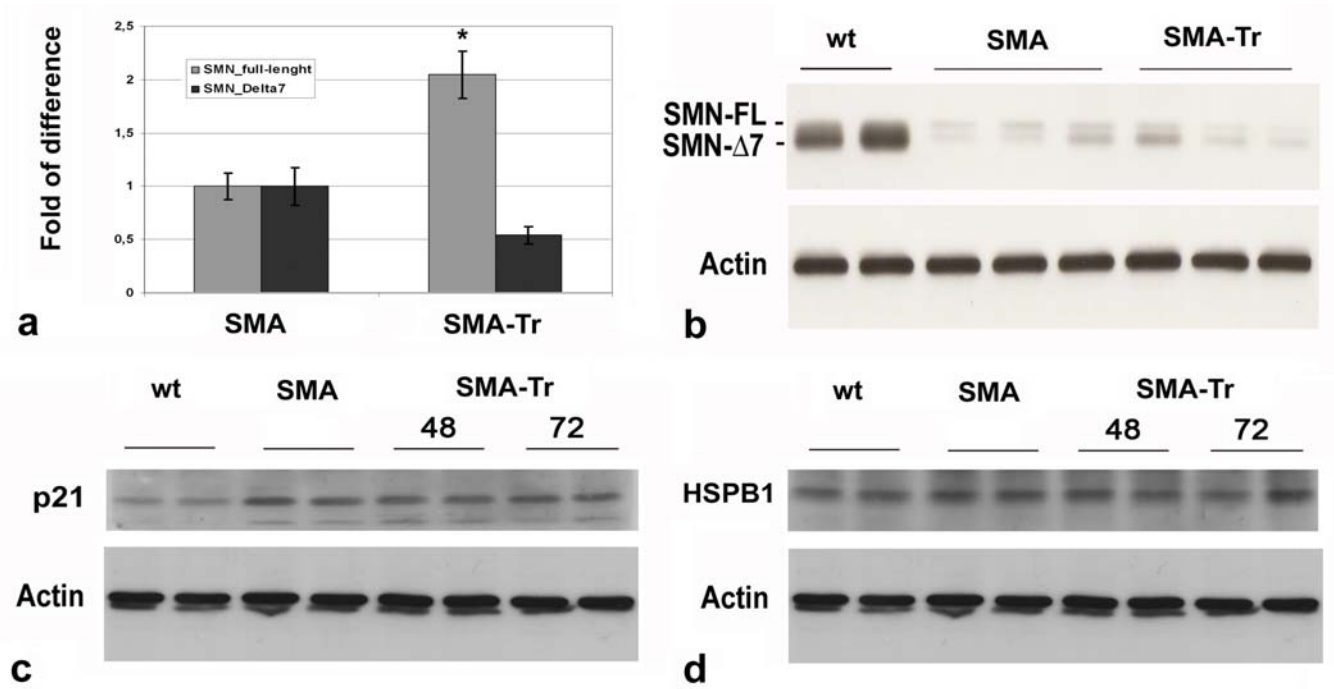

**Figure 9 s**

#### **ALDH<sup>hi</sup>SSC<sup>lo</sup> cells increase expression of SMN.**

(a) Transplanted ALDH<sup>hi</sup>SSC<sup>lo</sup> cells increase *SMN* full-length transcript in motoneurons (isolated by laser capture microdissection) *in vivo* (mean  $\pm$  SD) (\*  $P < 0.02$  treated vs untreated). (b) Western blot analysis of the whole spinal cord of treated SMA mice did not show any increase in SMN protein levels. The upper bands show full-length SMN protein; the lower bands show SMN $\Delta$ 7 protein. (c) Western blot analysis showed that isolated PMNs from SMA mice expressed a higher level of p21 compared to wt ( $P = 0.007$ , SMA vs wt) in line with results obtained by real-time PCR *in vivo*. The expression of *Cdkn1a* did not change after coculture. (d) No difference was observed in *Hsbp1* protein levels before and after co-culture.

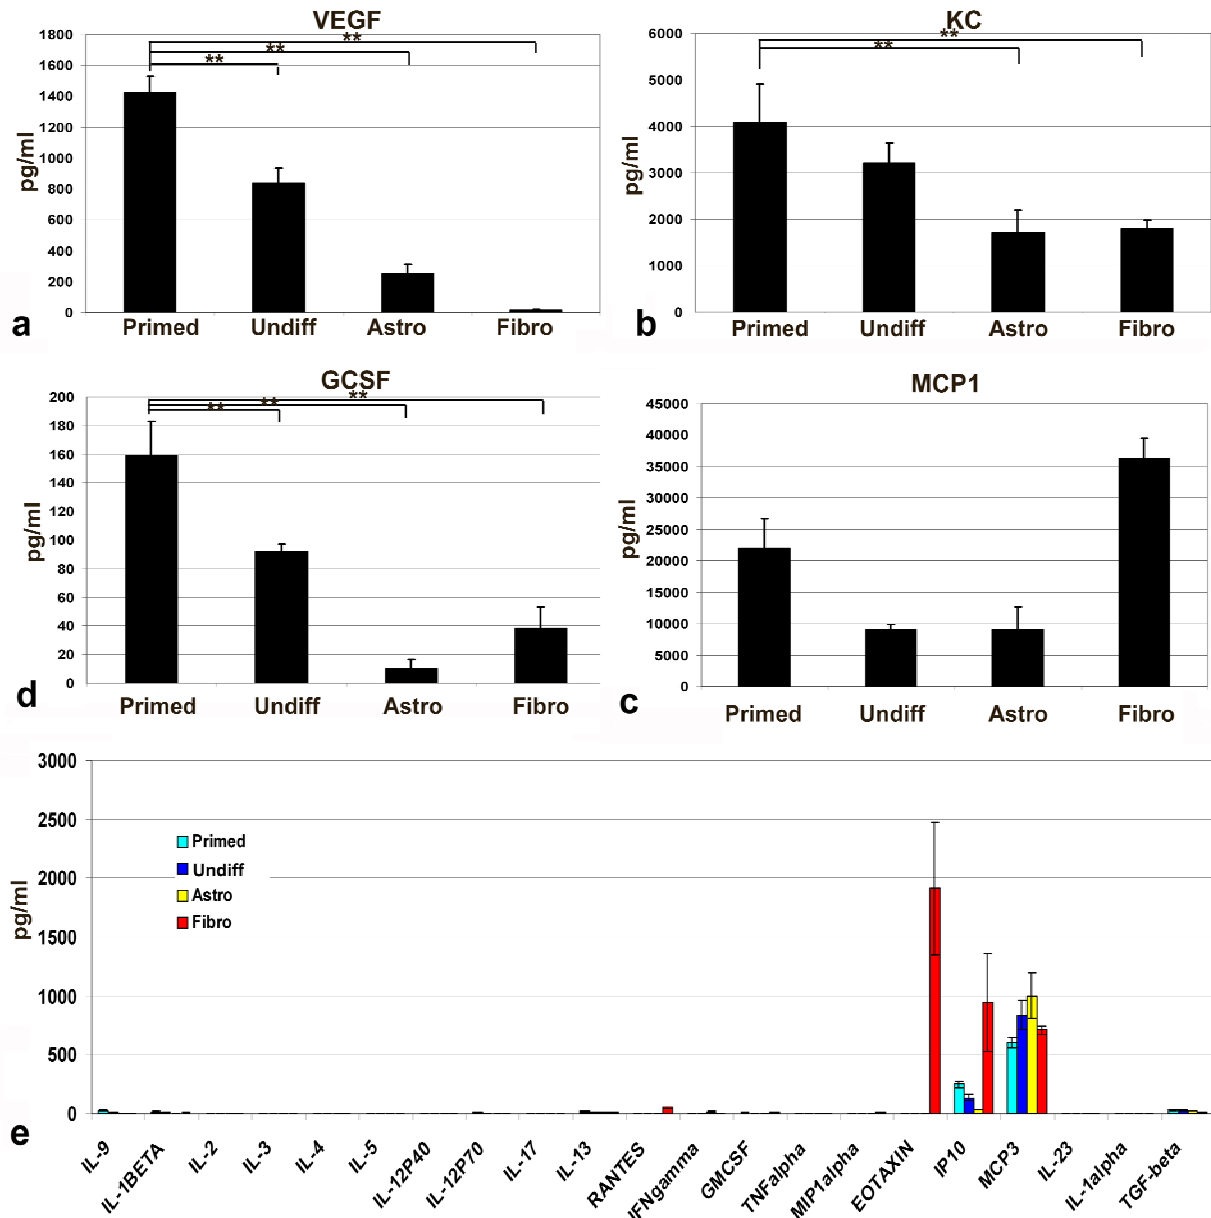

**Figure 10 s**

### Cytokines profile

Luminex multi-analyte profiling (xMAP) technology was used to profile 26 cytokines in the cell supernatants of primed ALDH<sup>hi</sup>SSC<sup>lo</sup> NSCs, undifferentiated cells, astrocytes, and fibroblasts. **(a)** Primed ALDH<sup>hi</sup>SSC<sup>lo</sup>-derived cells expressed significantly higher levels of vascular endothelial growth factor (VEGF) (\*\* P < 0.00001) compared to other cell types. **(b)** Primed ALDH<sup>hi</sup>SSC<sup>lo</sup> NSCs secreted significantly higher quantities of KC (CXCL1) than the other cell types (KC: primed vs undifferentiated, P = 0.02; primed vs astrocytes and primed vs fibroblasts, \*\* P < 0.00001,

respectively). (c) Granulocyte colony-stimulating factor (G-CSF) is produced by primed cells in a significantly higher quantity (G-CSF: primed vs other cells \*\*  $P < 0.00001$ ). (d) All cell types analyzed expressed high MCP1 levels, with the highest level expressed by fibroblasts (MCP1: primed vs undifferentiated,  $P = 0.000013$ ; primed vs astrocytes,  $P = 0.000013$ ; primed vs fibroblasts,  $P = 0.000027$ ). (e) Other proinflammatory cytokines were either not expressed or were secreted at very low levels in ALDH<sup>hi</sup>SSC<sup>lo</sup>-derived cells.

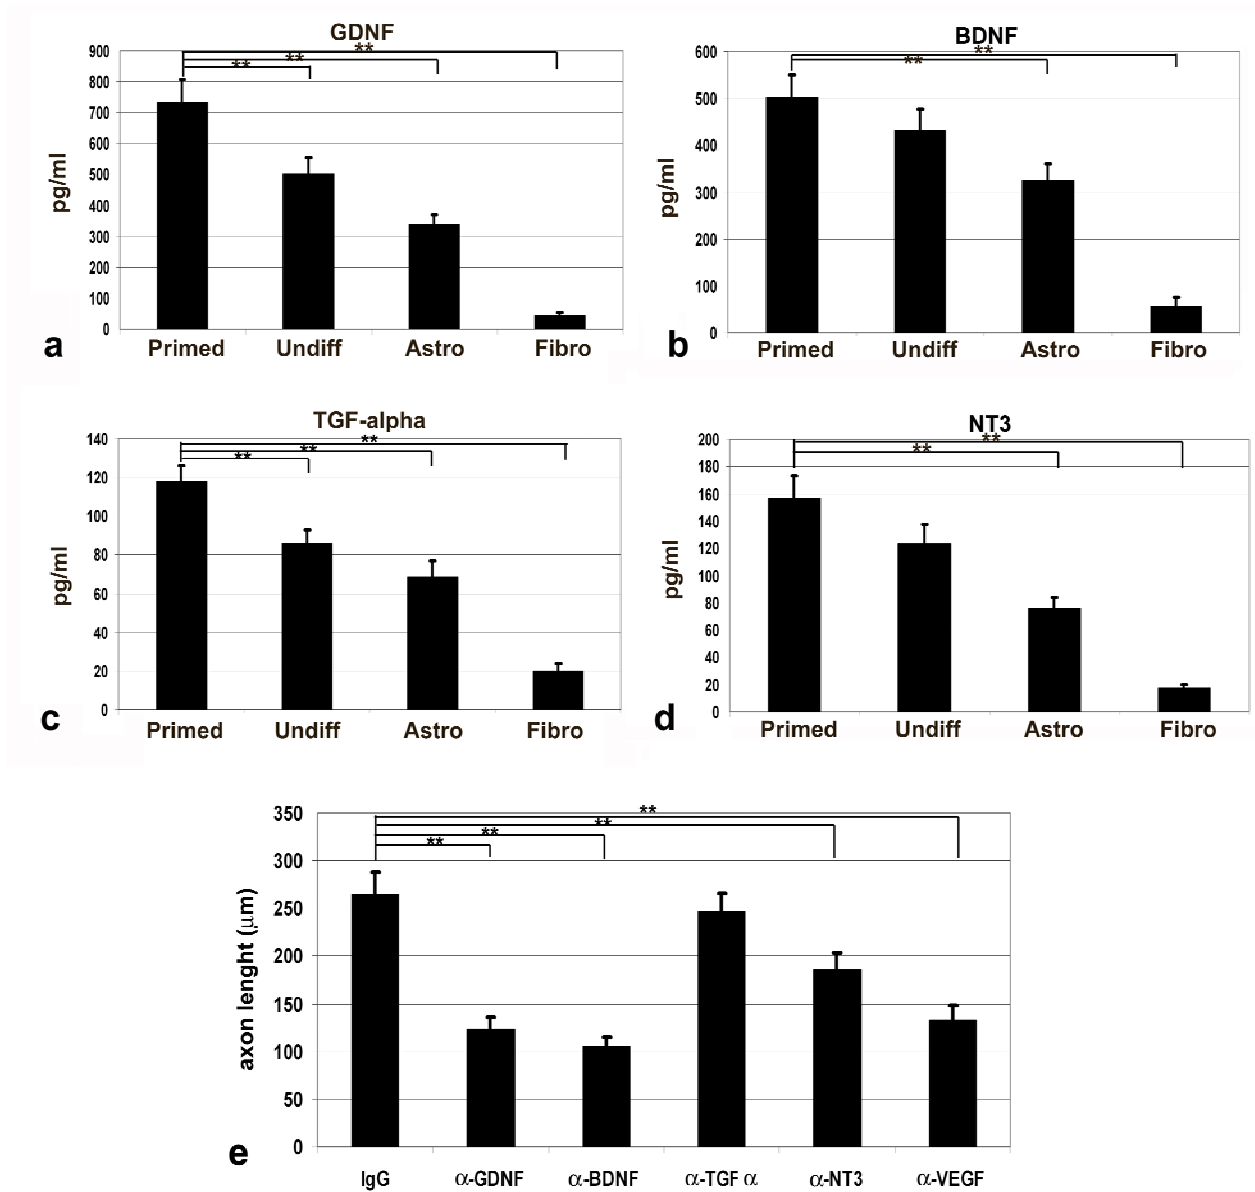

**Figure 11 s**

### Primed ALDH<sup>hi</sup>SSC<sup>lo</sup> NSCs secrete neurotrophic factors

(a–d) ELISA assay was performed to detect the profile of neurotrophins (GDNF, BDNF, TGF-α, and NT-3). Primed ALDH<sup>hi</sup>SSC<sup>lo</sup> NSCs secrete significant amounts of GDNF (a) (primed vs other cells, \*\*  $P < 0.00001$ ), BDNF (b) (primed vs undifferentiated,  $P = 0.00013$ ; primed vs astrocytes and primed vs fibroblasts, \*\*  $P < 0.00001$ , respectively), TGF-α (c) (primed vs other cells, \*\*  $P < 0.00001$ ), NT3 (d) (primed vs other cells, \*\*  $P < 0.00001$ ). (e) The axonal growth of SMA PMNs

cocultured with primed ALDH<sup>hi</sup>SSC<sup>lo</sup> NSCs was inhibited by neutralizing antibodies for GDNF, BDNF, TGF- $\alpha$ , NT3, and VEGF compared to control antibody (IgG) (GDNF vs control, \*\*  $P < 0.00001$ ; BDNF vs control, \*\*  $P < 0.00001$ ; TGF- $\alpha$  vs control, \*\*  $P = 0.00004$ ; NT3 vs control, \*\*  $P < 0.00001$ ; VEGF vs control, \*\*  $P < 0.00001$ ).

**Tab. 1****Gene expression profile: untreated SMA mice vs wt**

| Gene name                          | Accession number | Gene definition                                   | Probe<br>Affymetrix | Biological<br>function                                                                                            | Ratio<br>SMA/WT | Ratio<br>Treated/SMA | Ratio<br>Treated/WT |
|------------------------------------|------------------|---------------------------------------------------|---------------------|-------------------------------------------------------------------------------------------------------------------|-----------------|----------------------|---------------------|
| <b><i>Down-regulated genes</i></b> |                  |                                                   |                     |                                                                                                                   |                 |                      |                     |
| Gjb1                               | BC026833         | gap junction membrane channel protein beta 1      | 1448767_s_at        | nervous system development                                                                                        | 0.21            | 2.19                 | 0.46                |
| Rsad2                              | BB741897         | radical S-adenosyl methionine domain containing 2 | 1421009_at          | immune response                                                                                                   | 0.31            | 1.39                 | 0.43                |
| Mkrn1                              | BQ176661         | makorin, ring finger protein, 1                   | 1418435_at          | transcription activity, cell cycle regulation                                                                     | 0.34            | 1.24                 | 0.42                |
| Pomt1                              | BC027325         | protein-O-mannosyltransferase 1                   | 1424284_at          | protein amino acid O-linked glycosylation                                                                         | 0.35            | 1.74                 | 0.61                |
| 2810453I06Rik                      | NM_133703        | RIKEN cDNA 2810453I06 gene                        | 1418389_at          |                                                                                                                   | 0.36            | 0.89                 | 0.32                |
| Vps25                              | NM_026776        | vacuolar protein sorting 25                       | 1421050_at          | regulation of transcription, DNA-dependent antigen processing and presentation of peptide antigen via MHC class I | 0.39            | 2.15                 | 0.84                |
| H2-K1                              | BC011306         | histocompatibility 2, K1, K region                | 1425336_x_at        |                                                                                                                   | 0.4             | 1.30                 | 0.52                |
| Anln                               | BI690018         | anillin, actin binding protein                    | 1433543_at          | cytokinesis                                                                                                       | 0.4             | 1.38                 | 0.55                |
| Trf                                | AF440692         | transferrin                                       | 1425546_a_at        | iron ion                                                                                                          | 0.41            | 1.71                 | 0.70                |

|                                  |           |                                                                                 |              |                                                |      |      |      |
|----------------------------------|-----------|---------------------------------------------------------------------------------|--------------|------------------------------------------------|------|------|------|
|                                  |           |                                                                                 |              | transport                                      |      |      |      |
| Slc13a3                          | BB497312  | solute carrier family 13 (sodium-dependent dicarboxylate transporter), member 3 | 1438377_x_at | sodium ion transport                           | 0.42 | 2.10 | 0.88 |
| Cxcl7                            | NM_023785 | chemokine (C-X-C motif) ligand 7                                                | 1418480_at   | immune response                                | 0.42 | 1.40 | 0.59 |
| Arpp21                           | BC027107  | cyclic AMP-regulated phosphoprotein, 21                                         | 1424248_at   | signal transduction                            | 0.43 | 1.95 | 0.84 |
| Prkg1                            | NM_011160 | protein kinase, cGMP-dependent, type I                                          | 1449876_at   | dendrite development                           | 0.43 | 0.58 | 0.25 |
| Cyp51                            | NM_020010 | cytochrome P450, family 51                                                      | 1422534_at   | electron transport                             | 0.44 | 1.05 | 0.46 |
| <b><i>Up-regulated genes</i></b> |           |                                                                                 |              |                                                |      |      |      |
| Hspb1                            | U03561    | heat shock protein 1                                                            | 1425964_x_at | protein folding                                | 11.1 | 0.42 | 4.69 |
| Tmsb10                           | AV148480  | thymosin, beta 10                                                               | 1455946_x_at | actin cytoskeleton organization and biogenesis | 5.55 | 0.70 | 3.91 |
| Sult1a1                          | AK002700  | sulfotransferase family 1A, phenol-preferring, member 1                         | 1427345_a_at | lipid metabolism                               | 5.2  | 0.71 | 3.69 |
| Prodh                            | NM_011172 | proline dehydrogenase                                                           | 1417629_at   | proline metabolism                             | 4.35 | 0.69 | 3.02 |
| Hspb1                            | NM_013560 | heat shock protein 1                                                            | 1422943_a_at | protein folding                                | 4.35 | 0.46 | 1.98 |
| Cdkn1a                           | AK007630  | cyclin-dependent kinase inhibitor 1A (P21)                                      | 1424638_at   | regulation of progression through cell cycle   | 4    | 0.90 | 3.60 |
| Gdf10                            | L42114    | growth differentiation factor 10                                                | 1424007_at   | transforming growth factor beta receptor       | 3.7  | 0.62 | 2.28 |

|         |           |                                                                     |              |                                                                 |      |      |      |
|---------|-----------|---------------------------------------------------------------------|--------------|-----------------------------------------------------------------|------|------|------|
|         |           |                                                                     |              | signaling pathway                                               |      |      |      |
| Mt2     | AA796766  | metallothionein 2                                                   | 1428942_at   | nitric oxide mediated signal transduction                       | 3.57 | 0.73 | 2.62 |
| Tcap    | AK010167  | titin-cap                                                           | 1423145_a_at | sarcomere organization                                          | 3.12 | 0.59 | 1.85 |
| Mt1     | NM_013602 | metallothionein 1                                                   | 1422557_s_at | nitric oxide mediated signal transduction                       | 2.94 | 0.74 | 2.18 |
| Kcna5   | NM_008419 | potassium voltage-gated channel, shaker-related subfamily, member 5 | 1417680_at   | potassium ion transport                                         | 2.94 | 0.53 | 1.55 |
| Tsc22d3 | AF201289  | TSC22 domain family 3                                               | 1425281_a_at | regulation of transcription, DNA-dependent                      | 2.77 | 0.91 | 2.52 |
| Ccl2    | AF065933  | chemokine (C-C motif) ligand 2                                      | 1420380_at   | inflammatory response                                           | 2.7  | 1.33 | 3.60 |
| Ddx5    | AW536527  | DEAD (Asp-Glu-Ala-Asp) box polypeptide 5                            | 1433809_at   | RNA splicing                                                    | 2.7  | 1.12 | 3.03 |
| Hif3a   | AF416641  | hypoxia inducible factor 3, alpha subunit                           | 1425428_at   | response to hypoxia, regulation of transcription, DNA-dependent | 2.27 | 0.80 | 1.81 |

**Tab. 2**

**Gene expression profile: treated SMA mice vs untreated**

| Gene name                        | Accession number | Gene definition                      | Probe Affymetrix | Biological function                        | Ratio SMA/WT | Ratio Treated/SMA | Ratio Treated/WT |
|----------------------------------|------------------|--------------------------------------|------------------|--------------------------------------------|--------------|-------------------|------------------|
| <b><i>Up-regulated genes</i></b> |                  |                                      |                  |                                            |              |                   |                  |
| Atf3                             | BC019946         | activating transcription factor 3    | 1449363_at       | regulation of transcription, DNA-dependent | 2.94         | 4.11              | 12.07            |
| Socs3                            | BB241535         | suppressor of cytokine signaling 3   | 1455899_x_at     | regulation of cell growth                  | 1.16         | 4.03              | 4.66             |
| Tcrb-J                           | X67128           | T-cell receptor beta, joining region | 1452205_x_at     | cellular defense response                  | 0.42         | 3.97              | 1.68             |
| 5430435G22Rik                    | BB128517         | RIKEN cDNA 5430435G22 gene           | 1424987_at       | small GTPase mediated signal transduction  | 0.33         | 2.81              | 0.93             |
| Phka1                            | AA422311         | phosphorylase kinase alpha 1         | 1422744_at       | glycogen metabolism                        | 0.44         | 2.73              | 1.21             |
| Ier2                             | NM_010499        | immediate early response 2           | 1416442_at       | immediate-early gene inducible             | 1.04         | 2.53              | 2.64             |
| Itgb4                            | L04678           | integrin beta 4                      | 1427387_a_at     | cell-matrix adhesion                       | 0.50         | 2.51              | 1.25             |
| Dusp1                            | NM_013642        | dual specificity phosphatase 1       | 1448830_at       | response to oxidative stress               | 2.01         | 2.51              | 5.04             |
| Ccdc46                           | BG075808         | coiled-coil domain containing 46     | 1427205_x_at     |                                            | 1.22         | 2.50              | 3.04             |

|         |           |                                                  |              |                                            |      |      |      |
|---------|-----------|--------------------------------------------------|--------------|--------------------------------------------|------|------|------|
| Cyr61   | BM202770  | cysteine rich protein 61                         | 1438133_a_at | regulation of cell growth                  | 0.89 | 2.43 | 2.16 |
| Ildr1   | BG084606  | immunoglobulin-like domain containing receptor 1 | 1423276_at   | receptor activity                          | 0.55 | 2.41 | 1.33 |
| Usp18   | NM_011909 | ubiquitin specific peptidase 18                  | 1418191_at   | ubiquitin-dependent protein catabolism     | 0.95 | 2.36 | 2.25 |
| Ghdc    | NM_031871 | GH3 domain containing                            | 1419502_at   | GTPase activator activity                  | 0.70 | 2.35 | 1.64 |
| Egr1    | NM_007913 | early growth response 1                          | 1417065_at   | regulation of transcription, DNA-dependent | 1.30 | 2.33 | 3.04 |
| Zdhhc14 | BB544336  | zinc finger, DHHC domain containing 14           | 1438151_x_at | zinc ion binding                           | 0.58 | 2.31 | 1.35 |

***Down-regulated genes***

|       |           |                                                     |              |                                          |      |      |      |
|-------|-----------|-----------------------------------------------------|--------------|------------------------------------------|------|------|------|
| Myh1  | AJ002522  | myosin, heavy polypeptide 1, skeletal muscle, adult | 1427868_x_at | cytoskeleton organization and biogenesis | 1.88 | 0.08 | 0.15 |
| Car3  | NM_007606 | carbonic anhydrase 3                                | 1460256_at   | one-carbon compound metabolism           | 4.53 | 0.30 | 1.36 |
| Sypl2 | NM_008596 | synaptophysin-like 2                                | 1449206_at   | calcium ion homeostasis                  | 3.32 | 0.31 | 1.03 |
| Rbm5  | BE446879  | RNA binding motif                                   | 1438069_a_at | negative                                 | 1.59 | 0.32 | 0.51 |

|               |           |                                                                           |              |                                                            |      |      |      |
|---------------|-----------|---------------------------------------------------------------------------|--------------|------------------------------------------------------------|------|------|------|
|               |           | protein 5                                                                 |              | regulation of progression through cell cycle               |      |      |      |
| Shroom3       | AK003320  | shroom family member 3                                                    | 1454211_a_at | cell morphogenesis                                         | 1.81 | 0.32 | 0.58 |
| 4930408O21Rik | AK015115  | RIKEN cDNA 4930408O21                                                     | 1431741_a_at |                                                            | 1.56 | 0.34 | 0.53 |
|               |           | gene                                                                      |              |                                                            |      |      |      |
|               |           | bone morphogenic protein receptor, type II (serine/threonine kinase)      |              | transforming growth factor beta receptor signaling pathway |      |      |      |
| Bmpr2         | NM_007561 | ERBB receptor feedback inhibitor 1                                        | 1419616_at   |                                                            | 0.58 | 0.36 | 0.21 |
| Errfi1        | AI788755  | lipoprotein lipase                                                        | 1419816_s_at | stress-activated protein kinase signaling pathway          | 1.35 | 0.37 | 0.50 |
| Lpl           | NM_008509 | calpain 6                                                                 | 1415904_at   | lipid metabolism                                           | 2.20 | 0.40 | 0.88 |
| Capn6         | AI747133  | TAF11 RNA polymerase II, TATA box binding protein (TBP)-associated factor | 1450429_at   | proteolysis                                                | 2.39 | 0.41 | 0.98 |
| Taf11         | BC005603  | N-acetylneuraminate pyruvate lyase                                        | 1451995_at   | regulation of transcription, DNA-dependent                 | 1.02 | 0.41 | 0.42 |
| Npl           | BC022734  | Josephin domain containing 3                                              | 1424265_at   | N-acetylneuraminate lyase activity                         | 2.14 | 0.42 | 0.90 |
| Josd3         | AU044383  | cDNA sequence                                                             | 1452635_x_at |                                                            | 1.14 | 0.43 | 0.49 |
| BC003993      | BB532946  |                                                                           | 1438278_a_at | RNA binding                                                | 2.07 | 0.43 | 0.89 |



**Tab. 3****List of genes involved in the RNA processing**

| <b>Gene Name</b> | <b>Accession Number</b> | <b>Gene definition</b>                                                                   | <b>Probe Affymetrix</b> | <b>Ratio SMA/WT</b> | <b>Ratio Treated/SMA</b> | <b>Ratio Treated/WT</b> |
|------------------|-------------------------|------------------------------------------------------------------------------------------|-------------------------|---------------------|--------------------------|-------------------------|
| Hnrpk            | BB722680                | Heterogeneous nuclear ribonucleoprotein K                                                | 1454692_x_at            | 2.00                | 0.7                      | 1.40                    |
| Fus              | AF224264                | fusion, derived from t(12;16) malignant liposarcoma (human)                              | 1451285_at              | 1.72                | 0.53                     | 0.91                    |
| Dhx9             | U91922                  | DEAH (Asp-Glu-Ala-His) box polypeptide 9                                                 | 1425617_at              | 1.64                | 0.81                     | 1.33                    |
| Rbm5             | BE446879                | RNA binding motif protein 5                                                              | 1438069_a_at            | 1.59                | 0.32                     | 0.51                    |
| Snrpd3           | AK019453                | small nuclear ribonucleoprotein D3                                                       | 1422885_at              | 1.49                | 0.76                     | 1.13                    |
| Snrp70           | BC002169                | U1 small nuclear ribonucleoprotein polypeptide A                                         | 1451104_a_at            | 1.43                | 0.63                     | 0.90                    |
| Sfpq             | BF224766                | splicing factor proline/glutamine rich (polypyrimidine tract binding protein associated) | 1438459_x_at            | 1.43                | 0.68                     | 0.97                    |
| Trnt1            | BM225164                | tRNA nucleotidyl transferase, CCA-adding, 1                                              | 1425562_s_at            | 1.41                | 0.73                     | 1.03                    |
| Sf1              | BC009091                | Splicing factor 1                                                                        | 1423750_a_at            | 1.39                | 0.8                      | 1.11                    |
| Trit1            | BC019812                | tRNA isopentenyltransferase 1                                                            | 1424489_a_at            | 1.35                | 0.79                     | 1.07                    |
| Hnrpa2b1         | C88150                  | heterogeneous nuclear ribonucleoprotein A2/B1                                            | 1433829_a_at            | 1.33                | 0.44                     | 0.59                    |
| Prpf4b           | BC003769                | PRP4 pre-mRNA processing factor 4 homolog B (yeast)                                      | 1451909_a_at            | 1.33                | 0.77                     | 1.03                    |
| Sfrs7            | BE825013                | splicing factor, arginine/serine-rich 7                                                  | 1436871_at              | 1.30                | 0.8                      | 1.04                    |
| Dhx9             | U91922                  | DEAH (Asp-Glu-Ala-His) box polypeptide 9                                                 | 1451770_s_at            | 1.30                | 0.75                     | 0.97                    |
| Xab2             | NM_026156               | XPA binding protein 2                                                                    | 1448278_at              | 1.30                | 0.73                     | 0.95                    |
| Srrm1            | NM_016799               | serine/arginine repetitive matrix 1                                                      | 1450045_at              | 1.28                | 0.77                     | 0.99                    |
| Sf3a3            | AK015776                | splicing factor 3a, subunit 3                                                            | 1432488_a_at            | 1.28                | 0.52                     | 0.67                    |
| Sf3a3            | BC009141                | splicing factor 3a, subunit 3                                                            | 1423811_at              | 1.27                | 0.78                     | 0.99                    |

|               |           |                                                             |              |      |      |      |
|---------------|-----------|-------------------------------------------------------------|--------------|------|------|------|
| Sf3a1         | BB031756  | splicing factor 3a, subunit 1                               | 1449333_at   | 1.25 | 0.75 | 0.94 |
| Fus           | AF224264  | fusion, derived from t(12;16) malignant liposarcoma (human) | 1451286_s_at | 1.25 | 0.77 | 0.96 |
| Cugbp1        | AK014492  | CUG triplet repeat, RNA binding protein 1                   | 1427413_a_at | 1.25 | 0.75 | 0.94 |
| Fusip1        | AF060490  | FUS interacting protein (serine-arginine rich) 1            | 1423982_at   | 1.25 | 0.76 | 0.95 |
| Rpp30         | BG069849  | ribonuclease P/MRP 30 subunit (human)                       | 1423373_at   | 0.83 | 1.16 | 0.96 |
| Hnrpr         | BB822465  | heterogeneous nuclear ribonucleoprotein R                   | 1452030_a_at | 0.81 | 1.3  | 1.06 |
| Snrpa         | NM_015782 | small nuclear ribonucleoprotein polypeptide A               | 1417274_at   | 0.81 | 1.32 | 1.07 |
| Ddx56         | BC018291  | DEAD (Asp-Glu-Ala-Asp) box polypeptide 56                   | 1423815_at   | 0.81 | 1.28 | 1.03 |
| Snrpn         | NM_013670 | small nuclear ribonucleoprotein N                           | 1415895_at   | 0.81 | 1.39 | 1.12 |
| Crnkl1        | NM_025820 | Crn, crooked neck-like 1 (Drosophila)                       | 1420849_at   | 0.80 | 1.48 | 1.18 |
| Hnrpab        | BB168316  | heterogeneous nuclear ribonucleoprotein A/B                 | 1455855_x_at | 0.80 | 1.23 | 0.98 |
| Fbl           | NM_007991 | fibrillarin                                                 | 1416684_at   | 0.80 | 1.42 | 1.14 |
| Snrpn         | NM_013670 | small nuclear ribonucleoprotein N                           | 1415896_x_at | 0.79 | 1.23 | 0.98 |
| 0610009D07Rik | BE199670  | RIKEN cDNA 0610009D07 gene                                  | 1436681_x_at | 0.76 | 1.21 | 0.92 |
| Fusip1        | NM_010178 | FUS interacting protein (serine-arginine rich) 1            | 1449121_at   | 0.75 | 1.25 | 0.94 |
| EG666609      | NM_026506 | small nuclear ribonucleoprotein polypeptide G               | 1448357_at   | 0.75 | 1.32 | 0.99 |
| Bop1          | BM213936  | block of proliferation 1                                    | 1423264_at   | 0.73 | 1.33 | 0.97 |
| Rbm8a         | NM_025875 | RNA binding motif protein 8a                                | 1418120_at   | 0.72 | 1.46 | 1.05 |
| Rpp14         | BI455861  | ribonuclease P 14 subunit (human)                           | 1419461_at   | 0.67 | 1.31 | 0.88 |
